# Supplementary material for: Sleep Abnormalities in the Synaptopathies—SYNGAP1-Related Intellectual Disability and Phelan–McDermid Syndrome
Source: MDPI journal article supplement (doi:10.3390/brainsci11091229), 2021-09-17
Supplement: s1 [file s1]

**Supplemental Table S1.** Scores of sex impacted on sleep disorders.

|                           | Mean | S.D. | Mann-Whitney U | <i>p</i> Value |
|---------------------------|------|------|----------------|----------------|
| <i>SYNGAP1</i> -ID male   | 50.4 | 8.5  | 376            | 0.07           |
| <i>SYNGAP1</i> -ID female | 53.8 | 6.6  |                |                |
| PMD male                  | 48.3 | 10.5 | 264.5          | 0.81           |
| PMD female                | 46.8 | 8.1  |                |                |
| Siblings male             | 38.6 | 6.1  | 339.5          | 0.11           |
| Siblings female           | 41.9 | 8.0  |                |                |
